# Supplementary material for: Evaluating the impact of COVID-19 pandemic-related home confinement on the refractive error of school-aged children in Germany: a cross-sectional study based on data from 414 eye care professional centres
Source: HighWire-hosted journal article supplement (doi:10.1136/bmjopen-2023-071833), 2023-11-01
Supplement: bmjopen-2023-071833supp002_data_supplement.pdf [file bmjopen-2023-071833supp002_data_supplement.pdf]

Supplemental table 2. Percentage of myopes as a function of age (6-15) and year (2015-2021).

| Age<br>(years) | Sample<br>size | 2015               | 2016               | 2017               | 2018               | 2019               | 2020  | 2021  | p value<br>(2020) <sup>a</sup> | Z value<br>(2020) <sup>b</sup> | p value<br>(2021) <sup>c</sup> | Z value<br>(2021) <sup>d</sup> | p value<br>(2020) <sup>e</sup> | Z value<br>(2020) <sup>f</sup> | p value<br>(2021) <sup>g</sup> | Z value<br>(2021) <sup>h</sup> | p value<br>(2020) <sup>i</sup> | Z value<br>(2020) <sup>j</sup> | p value<br>(2021) <sup>k</sup> | Z value<br>(2021) <sup>l</sup> |
|----------------|----------------|--------------------|--------------------|--------------------|--------------------|--------------------|-------|-------|--------------------------------|--------------------------------|--------------------------------|--------------------------------|--------------------------------|--------------------------------|--------------------------------|--------------------------------|--------------------------------|--------------------------------|--------------------------------|--------------------------------|
| 6              | 5579           | 10.92              | 12.27 <sup>m</sup> | 12.18              | 9.97               | 10.51              | 12.16 | 16.09 | 0.94                           | 0.07                           | 0.03                           | -2.19                          | 0.54                           | -0.61                          | 0.005                          | -2.83                          | 0.25                           | -1.16                          | 0.002                          | -3.15                          |
| 7              | 5540           | 20.67 <sup>m</sup> | 18.10              | 18.82              | 17.68              | 18.35              | 20.47 | 21.07 | 0.92                           | 0.10                           | 0.84                           | -0.20                          | 0.39                           | -0.87                          | 0.25                           | -1.16                          |                                |                                |                                |                                |
| 8              | 5700           | 29.44              | 27.88              | 30.90 <sup>m</sup> | 26.65              | 27.17              | 32.00 | 35.82 | 0.62                           | -0.49                          | 0.03                           | -2.12                          | 0.11                           | -1.59                          | 0.002                          | -3.17                          |                                |                                |                                |                                |
| 9              | 5779           | 43.72 <sup>m</sup> | 40.94              | 43.52              | 42.17              | 38.46              | 44.35 | 48.09 | 0.80                           | -0.26                          | 0.07                           | -1.80                          | 0.30                           | -1.06                          | 0.01                           | -2.58                          |                                |                                |                                |                                |
| 10             | 6272           | 50.85              | 50.67              | 51.50 <sup>m</sup> | 50.67              | 49.43              | 54.67 | 57.25 | 0.19                           | -1.31                          | 0.02                           | -2.40                          | 0.09                           | -1.68                          | 0.005                          | -2.78                          |                                |                                |                                |                                |
| 11             | 6009           | 56.32              | 53.96              | 56.41 <sup>m</sup> | 52.20              | 52.17              | 53.02 | 59.03 | 0.17                           | 1.39                           | 0.29                           | -1.07                          | 0.62                           | 0.49                           | 0.04                           | -1.98                          |                                |                                |                                |                                |
| 12             | 6068           | 61.15              | 58.55              | 63.07              | 63.32 <sup>m</sup> | 59.18              | 61.49 | 60.48 | 0.44                           | 0.77                           | 0.24                           | 1.17                           | 0.86                           | -0.18                          | 0.81                           | 0.24                           |                                |                                |                                |                                |
| 13             | 6192           | 65.40 <sup>m</sup> | 61.91              | 63.41              | 63.53              | 62.93              | 67.76 | 67.43 | 0.29                           | -1.06                          | 0.37                           | -0.89                          | 0.06                           | -1.91                          | 0.09                           | -1.72                          |                                |                                |                                |                                |
| 14             | 6262           | 70.81 <sup>m</sup> | 66.74              | 68.88              | 66.25              | 67.91              | 69.07 | 69.45 | 0.43                           | 0.79                           | 0.54                           | 0.62                           | 0.67                           | -0.42                          | 0.55                           | -0.60                          |                                |                                |                                |                                |
| 15             | 6525           | 67.98              | 67.62              | 69.92              | 68.42              | 70.31 <sup>m</sup> | 66.86 | 70.22 | 0.12                           | 1.56                           | 0.97                           | 0.04                           | 0.36                           | 0.91                           | 0.53                           | -0.63                          |                                |                                |                                |                                |

Myopia is defined as SER ≤ −0.50D. Values are expressed in percent. P values are calculated based on two proportion Z-test.

- <sup>a</sup> p value associated with the comparison between the percentage of myopes in 2020 and the highest percentage in 2015-2019.
- <sup>b</sup> Z statistic value associated with the comparison between the percentage of myopes in 2020 and the highest percentage in 2015-2019.
- <sup>c</sup> p value associated with the comparison between the percentage of myopes in 2021 and the highest percentage in 2015-2019.
- <sup>d</sup> Z statistic value associated with the comparison between the percentage of myopes in 2021 and the highest percentage in 2015-2019.
- <sup>e</sup> p value associated with the comparison between the percentage of myopes in 2020 and the averaged percentage among 2015-2019.
- <sup>f</sup> Z statistic value associated with the comparison between the percentage of myopes in 2020 and the averaged percentage among 2015-2019.
- <sup>g</sup> p value associated with the comparison between the percentage of myopes in 2021 and the averaged percentage among 2015-2019.
- <sup>h</sup> Z statistic value associated with the comparison between the percentage of myopes in 2021 and the averaged percentage among 2015-2019.
- <sup>i</sup> p value associated with the comparison between the percentage of myopes in 2020 and the averaged percentage among 2015-2019 for all ages.
- <sup>j</sup> Z statistic value associated with the comparison between the percentage of myopes in 2020 and the averaged percentage among 2015-2019 for all ages.
- <sup>k</sup> p value associated with the comparison between the percentage of myopes in 2021 and the averaged percentage among 2015-2019 for all ages.
- <sup>l</sup> Z statistic value associated with the comparison between the percentage of myopes in 2021 and the averaged percentage among 2015-2019 for all ages.
- <sup>m</sup> Highest percentage of myopia relative to each age group, within the year range 2015-2019.
